# Supplementary material for: Synergy between molybdenum nitride and gold leading to platinum-like activity for hydrogen evolution
Source: Royal Society of Chemistry journal article supplement (doi:10.1039/c4cp04358h), 2014-11-11
Supplement: c4cp04358h1.pdf [file c4cp04358h1.pdf]

## Supplementary Information

### **Synergy between molybdenum nitride and gold leading to platinum-like activity for hydrogen evolution**

Adina Morozan<sup>a</sup>, Vincent Goellner<sup>a</sup>, Andrea Zitolo<sup>b</sup>, Emiliano Fonda<sup>b</sup>,

Bruno Donnadiu<sup>a</sup>, Deborah Jones<sup>a</sup>, Frédéric Jaouen<sup>a\*</sup>

a. Institut Charles Gerhardt de Montpellier, UMR 5253 CNRS - Université Montpellier II,  
Agrégats, Interfaces et Matériaux pour l'Energie, Place Eugène Bataillon, 34095 Montpellier  
cedex 5, France

b. Synchrotron SOLEIL, L'Orme des Merisiers Saint-Aubin - BP 48, 91192 Gif-sur-Yvette,  
France

| <b>Table S1. Structural parameters obtained from EXAFS fittings and known structure of <math>\gamma</math>-Mo<sub>2</sub>N</b>                                                                                               |                     |                               |                                              |                                     |
|------------------------------------------------------------------------------------------------------------------------------------------------------------------------------------------------------------------------------|---------------------|-------------------------------|----------------------------------------------|-------------------------------------|
| <b>Bond</b>                                                                                                                                                                                                                  | <b>distance / Å</b> | <b>Coordination number, N</b> | <b><math>\sigma^2</math> / Å<sup>2</sup></b> | <b><math>\Delta E_0</math> / eV</b> |
| <b>Mo3/20/80-Z8FA-1050</b>                                                                                                                                                                                                   |                     |                               |                                              |                                     |
| Mo-O                                                                                                                                                                                                                         | 1.77 (3)            | 1.5                           | 0.020 (4)                                    | 4.83                                |
| Mo-N                                                                                                                                                                                                                         | 2.07 (2)            | 4.0                           | 0.011 (2)                                    | 4.83                                |
| Mo-Mo                                                                                                                                                                                                                        | 2.97 (2)            | 4.7                           | 0.013 (2)                                    | 4.83                                |
| Mo-Mo                                                                                                                                                                                                                        | 4.03 (2)            | 2.0                           | 0.011 (2)                                    | 4.83                                |
| <b>Mo6/20/80-Z8FA-1050 after 500 cycles (gold CE)</b>                                                                                                                                                                        |                     |                               |                                              |                                     |
| Mo-O                                                                                                                                                                                                                         | 1.73 (2)            | 2.0(3)                        | 0.012 (3)                                    | 2.70                                |
| Mo-N                                                                                                                                                                                                                         | 2.05 (3)            | 3.5(4)                        | 0.016 (4)                                    | 2.70                                |
| Mo-Mo                                                                                                                                                                                                                        | 3.08 (3)            | 4.2(6)                        | 0.020 (3)                                    | 2.70                                |
| Mo-Mo                                                                                                                                                                                                                        | 4.20 (3)            | 2.0(4)                        | 0.020 (3)                                    | 2.70                                |
| <b><math>\gamma</math>-Mo<sub>2</sub>N</b><br>(expected interatomic distance and coordination numbers for bulk $\gamma$ -Mo <sub>2</sub> N with cell parameter 4.16 Å and having nitrogen atoms located in octahedral sites) |                     |                               |                                              |                                     |
| Mo-N                                                                                                                                                                                                                         | 2.08                | 3                             | --                                           | --                                  |
| Mo-Mo                                                                                                                                                                                                                        | 2.94                | 12                            | --                                           | --                                  |
| Mo-Mo                                                                                                                                                                                                                        | 4.16                | 6                             | --                                           | --                                  |

| <b>Table S2. Results from the fitting of the XPS narrow scan spectra</b>                                                                                                                                                                                                                                                                                                                      |                        |                        |                        |                               |                        |                        |                        |                        |                       |
|-----------------------------------------------------------------------------------------------------------------------------------------------------------------------------------------------------------------------------------------------------------------------------------------------------------------------------------------------------------------------------------------------|------------------------|------------------------|------------------------|-------------------------------|------------------------|------------------------|------------------------|------------------------|-----------------------|
|                                                                                                                                                                                                                                                                                                                                                                                               | Mo <sub>3d</sub>       |                        |                        | N <sub>1s</sub>               |                        |                        | O <sub>1s</sub>        |                        |                       |
|                                                                                                                                                                                                                                                                                                                                                                                               | Mo <sup>δ</sup>        | Mo <sup>IV</sup>       | Mo <sup>VI</sup>       | Mo <sub>2</sub> N & pyridinic | Pyrrolic               | Oxidized               | O <sup>2-</sup> (MoO)  | C=O                    | C-O-C                 |
| Mo3/20/80 - Z8FA -1050                                                                                                                                                                                                                                                                                                                                                                        | <b>228.7</b><br>(46.4) | <b>229.9</b><br>(12.4) | <b>232.5</b><br>(41.2) | <b>398.8</b><br>(36.0)        | <b>401.4</b><br>(47.4) | <b>402.8</b><br>(16.6) | <b>530.8</b><br>(42.2) | <b>532.7</b><br>(48.5) | <b>534.5</b><br>(9.3) |
|                                                                                                                                                                                                                                                                                                                                                                                               | 1.2 at. %              |                        |                        | 2.6 at. %                     |                        |                        | 4.7 at. %              |                        |                       |
| Mo6/20/80 -Z8FA-1050                                                                                                                                                                                                                                                                                                                                                                          | <b>228.8</b><br>(43.4) | <b>230.1</b><br>(15.3) | <b>233.3</b><br>(41.3) | <b>398.4</b><br>(74.8)        | <b>401.3</b><br>(22.2) | <b>402.7</b><br>(3.0)  | <b>530.7</b><br>(59.5) | <b>532.6</b><br>(35.1) | <b>534.5</b><br>(5.4) |
|                                                                                                                                                                                                                                                                                                                                                                                               | 3.3 at. %              |                        |                        | 3.0 at. %                     |                        |                        | 5.1 at. %              |                        |                       |
| For each sample, the first row gives the binding energy, BE, (in bold) and relative % (in brackets) for each species, while the second row reports the absolute atomic percentage for each element in the sample. For the Mo <sub>3d</sub> signal, the BE of the Mo 3d <sub>5/2</sub> level is given while the relative percentage corresponds to that of the Mo species assigned to that BE. |                        |                        |                        |                               |                        |                        |                        |                        |                       |

| <b>Table S3. Electrocatalytic activity for the HER in acid medium</b>                                                                                      |                                      |                                                            |                                                            |                                                  |             |
|------------------------------------------------------------------------------------------------------------------------------------------------------------|--------------------------------------|------------------------------------------------------------|------------------------------------------------------------|--------------------------------------------------|-------------|
| <b>Catalyst description</b>                                                                                                                                | <b>Electrolyte</b>                   | <b>Loading<br/>(all elements)<br/>/ mg·cm<sup>-2</sup></b> | <b>E @ 1.0<br/>mA·cm<sup>-2</sup><br/>/ mV vs.<br/>RHE</b> | <b>Tafel<br/>slope<br/>/ mV·dec<sup>-1</sup></b> | <b>Ref.</b> |
| 70 wt. % Pt/C                                                                                                                                              | 0.1 M HClO <sub>4</sub>              | 0.47                                                       | +12 <sup>(1)</sup>                                         | 42                                               | This work   |
| MoS <sub>2</sub>                                                                                                                                           | 0.5 M H <sub>2</sub> SO <sub>4</sub> | 300 nm MoS <sub>2</sub><br>layer                           | -160                                                       | ?                                                | [13]        |
| MoS <sub>2</sub> /graphene<br>(ca 35 wt. % Mo)                                                                                                             | 0.5 M H <sub>2</sub> SO <sub>4</sub> | 0.28                                                       | -100                                                       | 41                                               | [17]        |
| 1T-MoS <sub>2</sub>                                                                                                                                        | 0.5 M H <sub>2</sub> SO <sub>4</sub> | 0.050<br>(pure MoS <sub>2</sub> )                          | -160                                                       | 40                                               | [15]        |
| chemically exfoliated 1T-MoS <sub>2</sub>                                                                                                                  | 0.5 M H <sub>2</sub> SO <sub>4</sub> | ?                                                          | -140                                                       | 43                                               | [S1]        |
| 33 wt. % MoS <sub>2</sub> /MWCNT                                                                                                                           | 1.0 M H <sub>2</sub> SO <sub>4</sub> | 0.51                                                       | -150                                                       | 40                                               | [16]        |
| MoS <sub>2</sub> /Au                                                                                                                                       | 0.5 M H <sub>2</sub> SO <sub>4</sub> | 10 <sup>-3</sup> (excl. Au)                                | -150                                                       | 69                                               | [45]        |
| 30 wt. % Mo <sub>2</sub> C/CNT                                                                                                                             | 0.1 M HClO <sub>4</sub>              | 2.0                                                        | -63                                                        | 55                                               | [19]        |
| bulk Mo <sub>2</sub> C                                                                                                                                     | 1.0 M H <sub>2</sub> SO <sub>4</sub> | 1.4                                                        | -150                                                       | 56                                               | [18]        |
| 20 wt. % MoN/Vulcan                                                                                                                                        | 0.1 M HClO <sub>4</sub>              | 0.25                                                       | -260                                                       | 54                                               | [21]        |
| (Ni <sub>2</sub> Mo <sub>3</sub> N) <sub>0.3</sub> +Mo <sub>2</sub> N /<br>Vulcan (20 wt. % metal on<br>Vulcan)                                            | 0.1 M HClO <sub>4</sub>              | 0.25                                                       | -150                                                       | 36                                               | [21]        |
| δ-MoN/Vulcan (20 wt. %<br>metal on Vulcan)                                                                                                                 | 0.1 M HClO <sub>4</sub>              | 0.25                                                       | -250                                                       | 54                                               | [21]        |
| W <sub>2</sub> C microspheres                                                                                                                              | 1.0 M H <sub>2</sub> SO <sub>4</sub> | ?                                                          | -60                                                        | 118                                              | [S2]        |
| Mo3/20/80-Z8FA-1050                                                                                                                                        | 0.1 M H <sub>2</sub> SO <sub>4</sub> | 0.80                                                       | -255 <sup>(2)</sup>                                        | 125                                              | This work   |
| Mo3/20/80-Z8FA-1050 / Au                                                                                                                                   |                                      |                                                            | -130 <sup>(3)</sup>                                        | 78                                               |             |
| Mo0/20/80-Z8FA-1050 / Au                                                                                                                                   |                                      |                                                            | -220 <sup>(3)</sup>                                        | 109                                              |             |
| Mo6/20/80-Z8FA-1050 / Au                                                                                                                                   |                                      | 0.80<br>(0.25 Au,<br>estimated)                            | -20 <sup>(3)</sup>                                         | 67                                               |             |
| <sup>(1)</sup> positive due to the absence of H <sub>2</sub> in the electrolyte, shifting upward the H <sup>+</sup> /H <sub>2</sub> equilibrium potential; |                                      |                                                            |                                                            |                                                  |             |
| <sup>(2)</sup> Before and <sup>(3)</sup> after 1000 cycles at 100 mV·s <sup>-1</sup> between -0.6 and +0.4 V vs. SCE.                                      |                                      |                                                            |                                                            |                                                  |             |

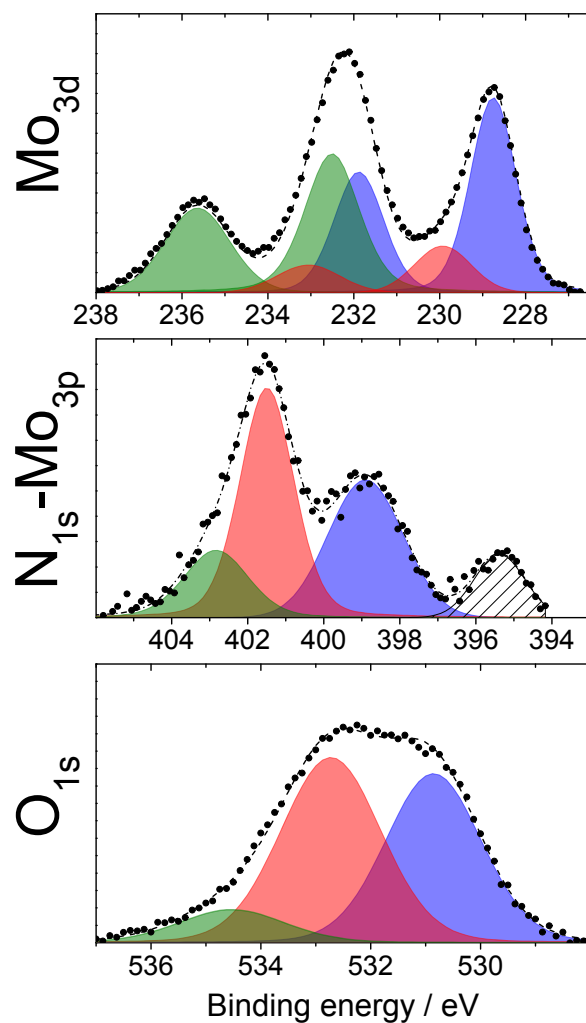

**Figure S1. X-ray photoelectron spectroscopy narrow scan spectra for  $\text{Mo}_{3d}$ ,  $\text{N}_{1s}$  and  $\text{O}_{1s}$  in Mo3/20/80-Z8FA-1050**

The filled circles represent the experimental data points and the dotted line the fitting. The  $\text{Mo}_{3p}$  contribution to the  $\text{N}_{1s}$  region is indicated by the dashed area. For a given core level, each colour identifies one species, with increasing BE in the order: blue, red, green.

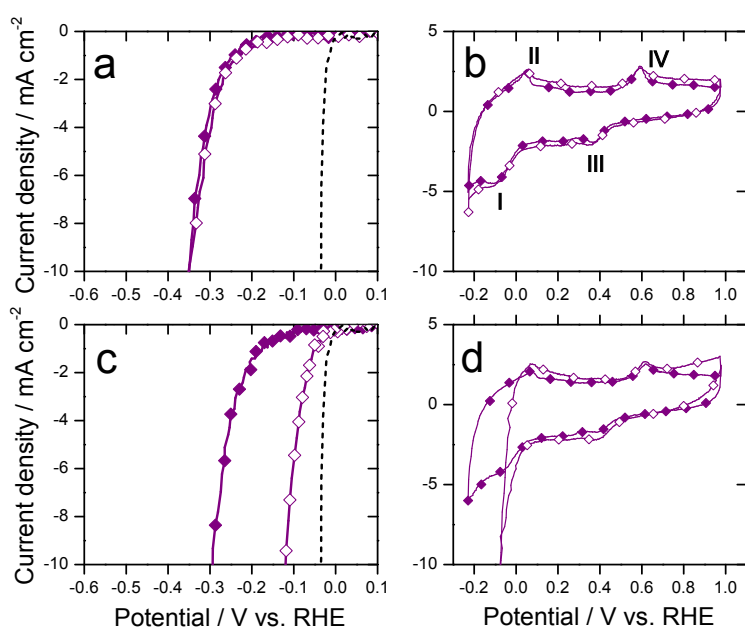

**Figure S2. Effect of potential limits during cycling on the activation of Mo6/20/80-Z8FA-1050**

**Left.** HER polarization curves before and after 1000 cycles at  $100 \text{ mV}\cdot\text{s}^{-1}$  in the potential limits of **a)**  $+0.17$  to  $+0.67 \text{ V vs. RHE}$ , **c)**  $-0.33$  to  $+0.67 \text{ V vs. RHE}$  (scan rate  $1 \text{ mV}\cdot\text{s}^{-1}$ ).

**Right.** Cyclic voltammograms for Mo6/20/80-Z8FA-1050 before and after 1000 cycles at  $100 \text{ mV}\cdot\text{s}^{-1}$  in the potential limits of **b)**  $+0.17$  to  $+0.67 \text{ V vs. RHE}$ , **d)**  $-0.33$  to  $+0.67 \text{ V vs. RHE}$  (scan rate  $20 \text{ mV}\cdot\text{s}^{-1}$ )

$1.0 \text{ M H}_2\text{SO}_4$  solution, rotating speed  $1500 \text{ rpm}$ , catalyst loading  $800 \mu\text{g}_{\text{Mo/N/C}}\cdot\text{cm}^{-2}$ . The dotted line corresponds to the Pt/C catalyst ( $328 \mu\text{g}_{\text{Pt}}\cdot\text{cm}^{-2}$ ). Potential corrected for the  $iR$  drop. The peaks labelled I/II are assigned to electrochemical hydrogen adsorption/desorption on  $\text{Mo}_2\text{N}$  while peaks III/IV are assigned to the reduction/oxidation of the passivated  $\text{Mo}_2\text{N}$  surface.

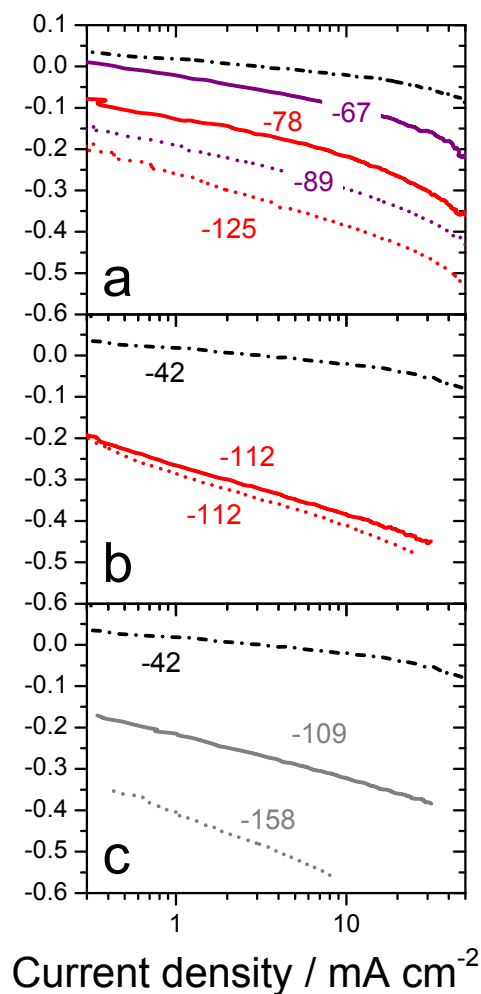

**Figure S3. Tafel plots for the hydrogen evolution reaction on Mo-based catalysts (a, b) and N-doped carbon (c).**

Same figure caption as Figure 3. The values of the Tafel slopes are indicated in  $\text{mV}\cdot\text{dec}^{-1}$  in the graph. The current density is in absolute value, for a logarithmic-scale presentation.

#### Supplementary references

- S1. M. A. Lukowski *et al*, *J. Am. Chem. Soc.*, 2013, **135**, 10274-10277.
- S2. D. J. Ham, R. Ganesan and J. S. Lee, *Int. J. Hydrogen Energy*, 2008, **33**, 6865-6872.
